# Epinephrine-Induced Arrhythmias Effect of Carbon Dioxide and Acid-Base Changes

Issaku Ueda, M.D., Ph.D., Kazuaki Fukushima, M.D., Carter M. Ballinger, M.D.,  
Robert W. Loehning, M.D., Ph.D.

WHILE the subject of arrhythmias occurring during cyclopropane anesthesia has attracted considerable investigation, controversy still exists regarding the role of carbon dioxide, acidosis, and catechol amines. Price and his co-workers<sup>1</sup> have shown in man that arrhythmias encountered during cyclopropane anesthesia with hypercarbia were coincident with an increase in plasma concentrations of catechol amines. They concluded that the arrhythmias were caused by liberation of catechol amine from sympathetic nerve endings in the myocardium. Robbins and Thomas<sup>2</sup> reported that excess carbon dioxide itself was the cause of cardiac irregularities during cyclopropane anesthesia in cats. In dogs, on the other hand, other authors have reported a protective effect of carbon dioxide against cardiac irregularities induced by epinephrine administered during cyclopropane anesthesia.<sup>3,4</sup> Graff *et al.*<sup>5</sup> concluded that the above protection resulted from a direct depressive effect of carbon dioxide on the myocardium.

Results of the above studies appear contradictory in that hypercarbia during cyclopropane anesthesia leads to cardiac arrhythmias from endogenously liberated catechol amines<sup>1,5</sup> and that hypercarbia affords protection from arrhythmias induced by exogenous epinephrine.<sup>3,4</sup> Price *et al.*,<sup>1</sup> however, have suggested that differences in arrhythmia producing mechanisms may exist between species.

This study proposes that the protection to epinephrine induced arrhythmias during prolonged hypercarbia<sup>3,4</sup> may have resulted from release of endogenous catechol amines producing a catechol amine tachyphylaxis; with development of tachyphylaxis, the animals

would be protected from arrhythmias during subsequent injections of epinephrine. Tachyphylaxis, defined by Seevers and Woods as "a rapidly developed short lived tolerance resulting from the oft repeated administration of a drug . . .," has been noticed with sympathomimetic amines.<sup>6</sup> Gilbert and associates<sup>7</sup> have shown that sympathomimetic amines induce partial tachyphylaxis to induction of ectopic beats in electrically-driven dog hearts.

The present report demonstrates that arrhythmia tachyphylaxis to exogenously administered epinephrine develops in dogs anesthetized with pentobarbital. Ligon and Nahas<sup>8</sup> reported that elevation of plasma catechol amines during carbon dioxide inhalation was prevented if the hydrogen ion concentration was buffered by an infusion of tris (hydroxymethyl) aminomethane (THAM).

To determine if protection from epinephrine induced ventricular arrhythmias can develop during pentobarbital anesthesia in this study, dogs were either (1) respired with 15 per cent carbon dioxide mixtures, (2) subjected to "diffusion respiration," or (3) infused with acid solutions. To investigate whether hypercarbia itself or the accompanying acidosis protects against epinephrine-induced arrhythmias, another series of animals was given THAM to prevent a fall in pH during inhalation of carbon dioxide mixtures. To determine whether acidosis itself or liberation of catechol amines is the cause of the protective effect of carbon dioxide, this study also included animals pretreated with catechol amine-depleting doses of reserpine.

## Method

Mongrel dogs weighing from 10 to 20 kg. were anesthetized with 25 mg./kg. of sodium pentobarbital intravenously. Respiration was provided by a Pahnner volume controlled res-

Accepted for publication February 5, 1962.  
The authors are in the Division of Anesthesiology, University of Utah, College of Medicine, Salt Lake City, Utah.

TABLE 1. Tachyphylaxis from Repeated Administration of Epinephrine

| Dose of<br>Epinephrine,<br>μg. kg. | Dog |     |     |     |     |    |     |     |     |     |     |
|------------------------------------|-----|-----|-----|-----|-----|----|-----|-----|-----|-----|-----|
|                                    | 1   | 2   | 3   | 4   | 5   | 6  | 7   | 8   | 9   | 10  | 11  |
| 5                                  | Big | ST  | ST  | VES | ST  | ST | Big | MVR | ST  | VT  | VT  |
| 5                                  | ST  |     |     | Big |     |    | VES | Big |     | VT  | VT  |
| 5                                  |     |     |     | ST  |     |    | Big | ST  |     | VES | VT  |
| 5                                  |     |     |     |     |     |    | Big |     |     | VES | VES |
| 10                                 | Big | ST  | ST  | ST  | VES | VT | ST  | ST  | VES | ST  | ST  |
| 10                                 | ST  |     |     |     | ST  | VT |     |     | Big |     | MVR |
| 10                                 |     |     |     |     |     | ST |     |     | ST  |     | ST  |
| 15                                 | ST  | ST  | VES | ST  | ST  | ST | ST  | ST  | ST  | ST  | VES |
| 15                                 |     |     | ST  |     |     |    |     |     |     |     |     |
| 20                                 | Big | Big | ST  | ST  | ST  | ST | ST  | ST  | ST  | ST  | ST  |
| 20                                 | ST  |     |     |     |     |    |     |     |     |     |     |
| 30                                 | ST  | ST  | ST  | ST  | ST  | ST | ST  | ST  | ST  | ST  | ST  |
| 40                                 | ST  | ST  | ST  | ST  | ST  | ST | ST  | ST  | ST  | ST  | ST  |
| 80                                 | ST  | ST  | ST  | ST  | ST  | ST |     | ST  |     |     |     |

ST: Sinus tachycardia; MVR: Multifocal ventricular rhythm; Big: Bigeminy; VES: Occasional ventricular extrasystole; VT: Ventricular tachycardia.  
Repeated injections of epinephrine were administered to the same dog. (A larger dose was given if the previous dose did not produce arrhythmias.)

pirator through an oral cuffed endotracheal tube. Gallamine triethiodide was administered intermittently for muscular relaxation. End-tidal P<sub>CO<sub>2</sub></sub> was measured by an infrared carbon dioxide analyzer, Beckman LBI model. The femoral artery and vein were each cannulated with a polyethylene catheter. Arterial pressure was measured by means of a pressure transducer connected to the indwelling catheter. The electrocardiogram and blood pressure were recorded with a Visicorder and a multichannel monitoring system (ENSCO). Arterial blood samples were collected anaerobically at regular intervals and measured for pH with a glass electrode and a Beckman GS

pH meter at 37° C. in a constant temperature water bath.  
Hypercarbia was induced by inhalation of 15 per cent carbon dioxide in oxygen or by "diffusion respiration" following a period of 30 minutes respiration with 100 per cent oxygen with a nonrebreathing system. Lactic acid 0.3 M and hydrochloric acid 0.15 M were diluted from stock solutions and administered by intravenous drip. THAM was prepared as 0.3 M solution of tris (hydroxymethyl) aminomethane containing sodium chloride 1.75 Gm. and potassium chloride 0.37 Gm. per 1,000 ml. according to Millar *et al.*<sup>9</sup>

TABLE 2. Effect of 15 Per Cent CO<sub>2</sub> Inhalation

| Dog | Control |                  | Blood pH Change From CO <sub>2</sub> Inhalation |      |      |      |      |      | ECG, after<br>Epinephrine,<br>20 μg. kg. I.V. |
|-----|---------|------------------|-------------------------------------------------|------|------|------|------|------|-----------------------------------------------|
|     |         |                  | Time in Minutes                                 |      |      |      |      |      |                                               |
|     | pH      | Pco <sub>2</sub> | 5                                               | 10   | 15   | 20   | 25   | 30   |                                               |
| 1   | 7.36    | 38.0             | 7.29                                            | 7.12 | 7.08 | 7.05 | 7.01 | 7.00 | ST                                            |
| 2   | 7.43    | 38.0             | 7.28                                            | 7.12 | 7.06 | 7.03 | 6.99 | 6.96 | ST                                            |
| 3   | 7.38    | 38.5             | 7.26                                            | 7.19 | 7.11 | 7.07 | 7.02 | 7.01 | ST                                            |
| 4   | 7.36    | 38.5             | 7.28                                            | 7.14 | 7.08 | 7.05 | 7.00 | 6.99 | ST                                            |
| 5   | 7.41    | 38.0             | 7.29                                            | 7.18 | 7.10 | 7.06 | 7.03 | 6.99 | ST                                            |

ST: Sinus tachycardia.

TABLE 3. Effect of Acid Infusion

| Dog | Control |                  |                           |     | Acid Infusion     |                |                 |      |                  | After 30 Minutes Recovery                    |      |                  |                                     |
|-----|---------|------------------|---------------------------|-----|-------------------|----------------|-----------------|------|------------------|----------------------------------------------|------|------------------|-------------------------------------|
|     | pH      | Pco <sub>2</sub> | Epinephrine, $\mu$ g./kg. | ECG | Type Infused      | Time (minutes) | Total Dose (ml) | pH   | Pco <sub>2</sub> | ECG, after Epinephrine, 20 $\mu$ g./kg. I.V. | pH   | Pco <sub>2</sub> | Epinephrine I.V., $\mu$ g./kg., ECG |
| 1   | 7.42    | 35.8             |                           |     | 0.3 M Lactic acid | 50             | 500             | 7.02 | 30.0             | ST                                           |      |                  |                                     |
| 2   | 7.38    | 31.2             |                           |     | 0.3 M Lactic acid | 50             | 500             | 7.00 | 31.0             | ST                                           |      |                  |                                     |
| 3   | 7.42    | 34.0             |                           |     | 0.3 M Lactic acid | 60             | 430             | 6.97 | 30.0             | ST                                           | 7.40 | 32.0             | 20 Big                              |
| 4   | 7.45    | 32.0             |                           |     | 0.15 M HCl        | 60             | 350             | 6.98 | 30.0             | Big                                          |      |                  |                                     |
| 5   | 7.35    | 36.0             | 20                        | VT  | 0.15 M HCl        | 65             | 450             | 6.96 | 31.5             | ST                                           | 7.33 | 35.0             | 20 VES                              |
| 6   | 7.37    | 39.0             | 20                        | VT  | 0.3 M Lactic acid | 70             | 500             | 7.00 | 35.5             | ST                                           | 7.35 | 35.0             | 20 MVR                              |
| 7   | 7.38    | 33.0             | 20                        | VT  | 0.3 M Lactic acid | 85             | 520             | 7.00 | 34.0             | ST                                           |      |                  |                                     |
| 8   | 7.39    | 39.0             | 20                        | VT  | 0.3 M Lactic acid | 75             | 530             | 7.03 | 35.0             | ST                                           | 7.35 | 37.0             | 20 VT                               |
| 9   | 7.38    | 39.5             | 20                        | VT  | 0.3 M Lactic acid | 85             | 650             | 6.95 | 33.5             | ST                                           | 7.36 | 37.5             | 20 VES                              |
| 10  | 7.37    | 36.5             |                           |     | 0.3 M HCl         | 55             | 400             | 7.01 | 38.5             | ST                                           | 7.35 | 36.5             | 20 VT                               |

ST: Sinus tachycardia; Big: Bigeminy; VT: Ventricular tachycardia; VES: Occasional ventricular extrasystole; MVR: Multifocal ventricular rhythm.

Epinephrine (Adrenaline chloride solution 1:1000) was diluted with normal saline to appropriate volume just before use. It was given in a single dose through an indwelling catheter in the femoral vein and subsequently washed in with minimal amounts of normal saline.

Results

REPEATED INTRAVENOUS INJECTIONS OF EPINEPHRINE (Table 1). Epinephrine was given in increasingly larger doses starting from an initial dose of 5  $\mu$ g./kg. Each injection was given at 10 minute intervals. The blood pressure which rose with administration of epinephrine returned to the preinjection level during this period. The dosage of epineph-

rine was increased when the preceding dose did not induce ventricular beats. Ventricular arrhythmias did not occur when the animals were finally challenged with 80  $\mu$ g./kg. (after 9 to 10 repeated epinephrine injections totaling approximately 120  $\mu$ g./kg.). When a single injection of 80  $\mu$ g./kg. of epinephrine was administered to each of three dogs not pretreated with epinephrine, ventricular tachycardia occurred. Ventricular tachycardia was noted in all animals in another series when 20  $\mu$ g. kg. of epinephrine was administered initially (table 3).

CARBON DIOXIDE (15 PER CENT) INHALATION. Five dogs were subjected to inhalation of a mixture of 15 per cent carbon dioxide and oxygen for 30 minutes. At the end of 30

TABLE 4. Effect of 15 Per Cent CO<sub>2</sub> Inhalation During 0.3 M THAM Infusion

| Dog | Control |                  | pH Changes During CO <sub>2</sub> Inhalation |      |      |      |      |      | Epinephrine I.V. |               |
|-----|---------|------------------|----------------------------------------------|------|------|------|------|------|------------------|---------------|
|     |         |                  | Time in Minutes                              |      |      |      |      |      | Dose<br>μg. kg.  | ECG<br>Effect |
|     | pH      | Pco <sub>2</sub> | 5                                            | 10   | 15   | 20   | 25   | 30   |                  |               |
| 1   | 7.38    | 39.0             | 7.25                                         | 7.35 | 7.38 | 7.38 | 7.37 | 7.38 | 20               | MVR           |
| 2   | 7.36    | 39.0             | 7.30                                         | 7.28 | 7.26 | 7.29 | 7.32 | 7.42 | 20               | Big           |
| 3   | 7.35    | 39.0             | 7.33                                         | 7.30 | 7.25 | 7.35 | 7.35 | 7.35 | 20               | Big           |
| 4   | 7.40    | 39.0             | 7.36                                         | 7.34 | 7.30 | 7.34 | 7.37 | 7.37 | 20               | VES           |
| 5   | 7.38    | 39.0             | 7.35                                         | 7.31 | 7.33 | 7.33 | 7.36 | 7.39 | 20               | VES           |

MVR: Multifocal ventricular rhythm; VES: Occasional ventricular extrasystole; Big: Bigeminy.

minutes, arterial pH had dropped from  $7.39 \pm 0.02$  to  $6.99 \pm 0.02$ . Ventricular irregularities were not observed in any animals with single administrations of 20 μg./kg. of epinephrine given just prior to termination of carbon dioxide inhalation (table 2). Injection of 20 μg./kg. of epinephrine in the absence of respiratory acidosis in controls uniformly resulted in ventricular tachycardia (table 3).

**INTRAVENOUS ACID INFUSIONS.** Five of the ten dogs receiving acid infusions were given 20 μg./kg. of epinephrine 30 minutes prior to acid infusion. This control injection was given to only one half of the animals in order to limit the possibility that tachyphylaxis could be induced by the initial injections of epinephrine. All five dogs given 20 μg./kg. of epinephrine developed ventricular arrhythmias (table 3).

When three dogs were infused with 0.15 M hydrochloric acid at approximately 0.4 ml./kg./minute, arterial pH dropped from  $7.39 \pm 0.04$  to  $6.99 \pm 0.04$ . End-expiratory P<sub>CO<sub>2</sub></sub>

was maintained within the normal range by hyperventilation. Arterial blood pH was maintained at approximately 7.00 for 30 minutes with hydrochloric acid infusion. When the animals were challenged with 20 μg./kg. of epinephrine, one dog showed bigeminy and two dogs developed sinus tachycardia.

When seven dogs were infused with 0.3 M lactic acid at the rate of 0.4 ml./kg./minute, the arterial blood pH fell from  $7.39 \pm 0.04$  to  $6.99 \pm 0.04$ . End-tidal P<sub>CO<sub>2</sub></sub> was again maintained within the normal range by hyperventilation. With the administration of 20 μg./kg. of epinephrine after 30 minutes of acidosis, none of the animals manifested ventricular irregularities.

After termination of the lactic acid infusion, arterial pH returned to normal limits ( $7.36 \pm 0.03$ ) within 30 minutes. Six dogs were given 20 μg./kg. of epinephrine intravenously after return of pH to normal; all of the animals showed ventricular arrhythmias.

**THAM WITH HYPERCARBIA.** (1) Five dogs were ventilated with a mixture of 15 per cent

TABLE 5. Effect of Apneic Oxygenation During 0.3 M THAM Infusion

| Dog | Control |                  | pH Change During Apneic Oxygenation |      |      |      |      |      | Epinephrine I.V.  |               |
|-----|---------|------------------|-------------------------------------|------|------|------|------|------|-------------------|---------------|
|     |         |                  | Time in Minutes                     |      |      |      |      |      |                   |               |
|     | pH      | Pco <sub>2</sub> | 10                                  | 20   | 30   | 40   | 50   | 60   | Dose<br>μg. / kg. | ECG<br>Effect |
| 1   | 7.40    | 39.0             | 7.38                                | 7.49 | 7.50 | 7.50 | 7.40 | 7.42 | 20                | Big           |
| 2   | 7.38    | 39.0             | 7.38                                | 7.45 | 7.45 | 7.43 | 7.42 | 7.40 | 20                | Big           |
| 3   | 7.36    | 39.0             | 7.35                                | 7.27 | 7.28 | 7.30 | 7.34 | 7.40 | 20                | VES           |
| 4   | 7.41    | 39.0             | 7.40                                | 7.45 | 7.41 | 7.43 | 7.40 | 7.39 | 20                | VES           |
| 5   | 7.36    | 39.0             | 7.35                                | 7.35 | 7.38 | 7.38 | 7.37 | 7.38 | 20                | Big           |

Big: Bigeminy; VES: Occasional ventricular extrasystole.

TABLE 6. Effect of Reserpine Pretreatment and 15 Per Cent CO<sub>2</sub> Inhalation

| Dog | Control |                  | pH Change During<br>15 Per Cent CO <sub>2</sub><br>Inhalation |      |      | Epinephrine<br>I.V. |               |
|-----|---------|------------------|---------------------------------------------------------------|------|------|---------------------|---------------|
|     |         |                  | Time in Minutes                                               |      |      |                     |               |
|     | pH      | Pco <sub>2</sub> | 10                                                            | 20   | 30   | Dose<br>μg. kg.     | ECG<br>Effect |
| 1   | 7.36    | 39.5             | 7.20                                                          | 7.08 | 7.00 | 20                  | VES           |
| 2   | 7.35    | 38.0             | 7.15                                                          | 7.09 | 7.01 | 20                  | VT            |
| 3   | 7.37    | 36.0             | 7.17                                                          | 7.10 | 7.01 | 20                  | VT            |
| 4   | 7.36    | 36.0             | 7.13                                                          | 7.05 | 6.98 | 20                  | VT            |
| 5   | 7.36    | 37.0             | 7.20                                                          | 7.09 | 7.00 | 20                  | VT            |

VES: Occasional ventricular extrasystole; VT: Ventricular tachycardia.

carbon dioxide and oxygen. It was found by repeated pH determinations that an infusion of approximately 1.0 ml./kg./minute of 0.3 M THAM was sufficient to prevent a change in pH. After a 30 minute period of carbon dioxide inhalation and THAM administration 20 μg./kg. of epinephrine was administered. Ventricular arrhythmias were manifested in all animals (table 4).

(2) Five dogs were subjected to diffusion oxygenation after 30 minutes denitrogenation by respiration with 100 per cent oxygen. THAM was infused after respiration was arrested by gallamine triethiodide administration. The drip rate of THAM was regulated so that the arterial pH was maintained at a normal level. When 20 μg./kg. of epinephrine was given intravenously after one hour of diffusion respiration, all animals developed ventricular irregularities (table 5).

**RESERPINE PRETREATMENT.** Five dogs were pretreated with reserpine 0.1 mg./kg. intraperitoneally 24 and 48 hours prior to the experiments. An intraperitoneal administration of reserpine 0.1 mg./kg. has been shown to deplete the total myocardial catechol amines.<sup>10</sup> When 15 per cent carbon dioxide with oxygen was administered for 30 minutes, arterial pH dropped to  $7.00 \pm 0.03$ . Injection of 20 μg./kg. of epinephrine induced ventricular arrhythmias in all animals in spite of existing respiratory acidosis (table 6).

### Discussion

The finding that inhalation of 15 per cent carbon dioxide for 30 minutes provided pro-

tection against epinephrine induced irregularities, is in agreement with results obtained by previous workers.<sup>3,4</sup> However, protection was not afforded when arterial pH was kept within the normal range by THAM infusion. This observation suggests that pH change is the predominant factor in development of protection. Results obtained by acid infusions provide further evidence for the above assumption. Animals with increased hydrogen ion concentration by acid infusions were shown to have developed protection against epinephrine-induced ventricular irregularities in spite of normal end-tidal Pco<sub>2</sub> levels.

Reduced vasopressor reaction to systemically administered catechol amines during acidosis has been reported.<sup>11,13</sup> Sechzer *et al.*<sup>15</sup> assumed that there is a depression in the vasopressor response at the tissue receptor level during acidosis. The possibility of development of similar depression at the cardiac receptor level during acidosis cannot be refuted. This present experiment does not eliminate the possibility of direct inhibition of metabolism during acidosis as has been suggested by Nahas, Ligou, and Mehman<sup>14</sup> in their study of the effects of epinephrine on oxygen consumption in dogs. Working with *Escherichia coli*, Weiner and Draskoczy<sup>15</sup> demonstrated a correlation between the inhibitory effect on oxidative mechanisms and concentration of unionized molecules of organic acid. Inhibition of oxidative metabolism of cell-free supernatants was found to be proportional to the concentrations of dissociated molecules. Presumably intracellular pH had a predominant effect on oxidative metabolism. A previous report from this laboratory<sup>16</sup> showed that pretreatment with sodium fluoride, an inhibitor of glycogenolysis, decreased the incidence of ventricular irregularities induced by epinephrine. It is possible that metabolism is inhibited by acidosis to such a degree that it may protect from induced cardiac irregularities.

Price *et al.*<sup>1</sup> and Ligou and Nahas<sup>8</sup> demonstrated that the level of circulating endogenous catechol amines was increased during respiratory acidosis. It has also been shown<sup>8</sup> that the level of circulating endogenous catechol amines was also increased during acid infusions when pH dropped below 7.00, but was not increased during hypercarbia if arterial

pH was buffered within the normal range with a THAM infusion. The present study shows that protection to epinephrine-arrhythmias occurs during acidosis, a condition in which endogenously liberated plasma catechol amine levels have been reported to be elevated.<sup>1,8</sup> Furthermore, when liberation of endogenous catechol amines was prevented by catechol amine depleting doses of reserpine, acidosis which otherwise protects the heart from epinephrine-arrhythmias failed to do so. Since tachyphylaxis rapidly developed with exogenously administered epinephrine, it is plausible that tachyphylaxis, developed by endogenous catechol amine liberation, provided protection rather than acidosis itself.

The subject of supersensitivity after pharmacological or surgical denervation of neurotransmitter substances has been reviewed by Emmelin.<sup>17</sup> Whether supersensitivity to epinephrine after reserpine occurred in the present study is open to question. The development of supersensitivity was observed in the nictitating membrane of the cat by Flemming and Trendelenburg<sup>18</sup> after daily reserpine administration of 0.1 mg./kg. for 7 to 14 days. Supersensitivity of the cardiac pacemaker and the circulatory system to epinephrine required at least three days of reserpine 0.1 mg./kg. administration. However, since studies of supersensitivity to epinephrine-arrhythmias after reserpine have not yet been reported, it is impossible to refute in our study the occurrence of supersensitivity to epinephrine counteracting a protective action of acidosis. A supersensitive state may apparently develop from interruption of a relative tachyphylaxis present in the normal state. Burn and Rand<sup>19</sup> suggest that catechol amines are released continuously from the combined form of tissue stores, thereby partially occupying receptors available for the transmitters. According to the above authors "sensitivity" to catechol amines is low in the normal state. After depletion of stores of catechol amines by surgical denervation or reserpine pretreatment, termination of catechol amine leakage leaves receptor sites totally open and "sensitivity" increases. Winder, Anderson and Parke<sup>20</sup> working with a series of sympathomimetic amines on their capacity to constrict nasal mucosa, suggested that the development of tachyphylaxis is caused by progressive re-

ceptor occupation. By plotting cumulative effects of decongestant activity of sympathomimetic amines on a probability scale against a logarithm of cumulative doses, they obtained a linear relationship. The concept of Burn and Rand<sup>19</sup> mentioned above can be interpreted that there exists a relative tolerance to catechol amines in the normal state. In our experiment absence of protection during acidosis, after reserpine, seems best explained by lack of development of tachyphylaxis at the receptor site.

Recovery of sensitivity after termination of acidosis demonstrated in the present study could be explained by the diffusion of epinephrine from active myocardial sites and dilution by circulating blood or by metabolism of catechol amine near the myocardial receptor. Price *et al.*<sup>1</sup> reported the existence of discrepancies between endogenously liberated plasma catechol amine levels at the time of initiation of ventricular irregularities during respiratory acidosis and the plasma levels needed to produce irregularities during exogenous infusions. Measuring blood catechol amine levels they found that ten times higher catechol amine levels were necessary on infusion of exogenous epinephrine to induce ventricular arrhythmias as compared to the endogenously liberated plasma catechol amine levels during ventricular arrhythmias initiated by respiratory acidosis. The above authors assumed that during hypercarbia higher catechol amine concentrations existed at the myocardium than catechol amine levels in the plasma, *i.e.*, a concentration gradient presumably existed from myocardium toward plasma. On the other hand Bacq<sup>21</sup> showed that administered epinephrine leaves the circulation but if O-methyl transferase were inhibited by pyrogallol, nearly maximal response of the denervated nictitating membrane was demonstrated even after blood catechol amine was undetectable. We are inclined to believe that termination of tachyphylaxis was attributable to metabolism of catechol amines near the site of liberation and action.

### Summary

Inhalation of a mixture of 15 per cent carbon dioxide with oxygen resulted in a decreased incidence of ventricular irregularities

from epinephrine injection in dogs anesthetized with pentobarbital.

When the arterial *pH* was kept within the normal range by THAM infusions during hypercarbia induced either by 15 per cent carbon dioxide inhalation or apneic oxygenation, protection against epinephrine-arrhythmias was not observed.

Infusion of 0.15 *M* hydrochloric acid or 0.3 *M* lactic acid provided protection against epinephrine-arrhythmias, although end-expiratory  $P_{CO_2}$  levels were kept within normal range by hyperventilation.

When the animals were pretreated with catechol amine depleting doses of reserpine, respiratory acidosis did not provide protection against epinephrine-arrhythmias.

With repeated injections of increasingly larger doses of epinephrine given at ten-minute intervals, tachyphylaxis developed; arrhythmias did not occur even with doses of epinephrine 16 times larger than those doses which in animals not pretreated with epinephrine produced arrhythmias.

The role of tachyphylaxis to catechol amines in providing protection to arrhythmias during acidosis was discussed.

Supported by grants RG-6677 and H-5678 from the National Institutes of Health, U. S. Public Health Service.

### References

- Price, H. L., Lurie, A. A., Jones, R. E., Price, M. L., and Linde, H. L.: Cyclopropane anesthesia; epinephrine and norepinephrine in initiation of ventricular arrhythmias by carbon dioxide inhalation, *ANESTHESIOLOGY* 19: 619, 1958.
- Robbins, B. H., and Thomas, J. D.: Cyclopropane arrhythmias in the cat: their cause, prevention and correction, *ANESTHESIOLOGY* 21: 163, 1960.
- Graff, T. D., Harris, L. C., Arbogast, N. R., and Phillips, O. C.: Myocardial excitability of dogs during cyclopropane anesthesia: effect of diffusion respiration, *Anesth. Analg.* 39: 293, 1960.
- Virtue, R. W. and Simmons, B. F.: Effect of respiratory acidosis and alkalosis on cyclopropane epinephrine induced arrhythmias, *J. Pharmacol. Exp. Ther.* 115: 148, 1955.
- Johnstone, M.: Cyclopropane anaesthesia and ventricular arrhythmias, *Brit. Heart J.* 12: 239, 1950.
- SeEVERS, M. H., and Woods, L. A.: Phenomena of tolerance, *Amer. J. Med.* 14: 546, 1953.
- Gilbert, J. L., Lange, G., Poleyov, I., and McC. Broods, C.: Effects of vasoconstrictor agents on cardiac irritability, *J. Pharmacol. Exp. Ther.* 123: 9, 1958.
- Ligou, J. C., and Nahas, G. G.: Comparative effects of acidosis induced by acid infusion and  $CO_2$  accumulation, *Amer. J. Physiol.* 198: 1201, 1960.
- Millar, R. A., Brindle, G. F., and Gilbert, R. G. B.: Studies with an organic buffer (THAM) during apnoeic oxygenation in dogs, *Brit. J. Anaesth.* 32: 248, 1960.
- Waud, D., Kottogoda, S. R., and Krayner, O.: Threshold dose and time course of norepinephrine depletion of the mammalian heart by reserpine, *J. Pharmacol. Exp. Ther.* 124: 340, 1958.
- Campbell, G. S., Houle, D. E., Crisp, N. W., Weil, M. H., and Thrower, W. B.: Depressed response to intravenous sympathomimetic agents in humans during acidosis, *Dis. Chest* 33: 18, 1958.
- Darby, T. B., Aldinger, E. E., Gadsden, R. H., and Thrower, W. B.: Effect of metabolic acidosis on ventricular isometric systolic tension and the responses to epinephrine and levaterenol, *Circulat. Res.* 8: 1242, 1960.
- Seelzer, P. H., Egbert, L. D., Linde, H. W., Cooper, D. Y., Dripps, R. D., and Price, H. L.: Effect of  $CO_2$  inhalation on arterial pressure, ECG and plasma catechol amines and 17-OH corticosteroids in normal man, *J. Appl. Physiol.* 15: 454, 1960.
- Nahas, G. G., Ligou, J. C., and Melman, B.: Effects of *pH* changes on  $O_2$  uptake and plasma catechol amine levels in dog, *Amer. J. Physiol.* 198: 60, 1960.
- Weiner, N., and Draskoczy, P.: Effects of organic acids on the oxidative metabolism on intact and disrupted *E. coli*, *J. Pharmacol. Exp. Ther.* 132: 299, 1961.
- Ueda, I., Loehning, R. W., and Ueyama, H.: Relationship between sympathomimetic amines and methylxanthines inducing cardiac arrhythmias, *ANESTHESIOLOGY* 22: 926, 1961.
- Emmelin, N.: Supersensitivity following "pharmacological denervation," *Pharmacol. Rev.* 13: 17, 1961.
- Fleming, W. W., and Trendelenburg, U.: Development of supersensitivity to norepinephrine after pretreatment with reserpine, *J. Pharmacol. Exp. Ther.* 133: 41, 1961.
- Burn, J. H., and Rand, M. J.: Cause of supersensitivity of smooth muscle to noradrenaline after sympathetic degeneration, *J. Physiol.* 147: 135, 1959.
- Winder, C. W., Anderson, M. M., and Parke, H. C.: Comparative properties of six phenethylamines, with observations on the nature of tachyphylaxis, *J. Pharmacol. Exp. Ther.* 93: 83, 1948.
- Bacq, Z. M.: *Adrenergic Mechanism*, Boston, Little, Brown & Co., 1960, p. 518.
